# Supplementary material for: Tumorigenic Properties of Iron Regulatory Protein 2 (IRP2) Mediated by Its Specific 73-Amino Acids Insert
Source: PubMed Central journal article supplement (PMC2854138; doi:10.1371/journal.pone.0010163), 2010-04-13
Supplement: pone.0010163.s007.pdf [file pone.0010163.s007.pdf]

Table S1. Primers used for real-time PCR

| Gene name   | Primer sequence (5 → 3')                               | Genebank accession number | Expected product size (bp) |
|-------------|--------------------------------------------------------|---------------------------|----------------------------|
| TfR1        | F: GCAAGTAGATGGCGATAACAG<br>R: GACGATCACAGCAATAGTCCC   | NM 003234                 | 145                        |
| H- Ferritin | F: GAGACCACAAGCGACCCGCA<br>R: GAGGTGACGGAGGGCTGGCT     | NM 002032.2               | 138                        |
| PTNP11      | F: CCCACATCAAGATTCAGAACACT<br>R: GCCCGTGATGTTCCATGTAA  | NM 002834                 | 105                        |
| DNAJA1      | F: GCTGCAACGGAAGGAAGAT<br>R: CCAGTCCTGGTTCTTGGTCT      | NM 001539                 | 120                        |
| HSPE1       | F: GGTTGAAAGGAGTGCTGCTGAA<br>R: GAATGGGCAGCATCATGTTGAT | NM 002157                 | 303                        |
| PSMC6       | F: GCTGCGTCCAGGAAGATTAG<br>R: TGCGAACATACCTGCTTCAG     | NM 002806                 | 196                        |
| VCP         | F: TTCCTGAAGTTTGGCATGACAC<br>R: GCGGGCCTTGTCAAAGAT     | NM 007126                 | 195                        |
| VDAC3       | F: AATTCGCCCTGGGTTACAA<br>R: TCAGTGCCATCGTTCACATGT     | NM 001135694              | 65                         |
| RPS18       | F: TGTGGTGTGAGGAAAGCAG<br>R: AAGTGACGCAGCCCTCTATG      | NM 022551                 | 252                        |

TfR1: transferrin receptor 1; PTNP11: tyrosine phosphatase, non-receptor type 11; DNAJA1: DnaJ (Hsp40) homolog, subfamily A, member 1; HSPE1: heat shock 10kDa protein 1 (chaperonin 10); PSMC6: proteasome 26S subunit, ATPase, 6; VCP: valosin-containing protein; VDAC3: voltage-dependent anion channel 3; RPS18: ribosomal protein S18.
